# Supplementary material for: Fabrication of highly uniform three-dimensional SERS substrates by control of wettability
Source: Royal Society of Chemistry journal article supplement (doi:10.1039/c2tc00512c), 2012-11-27
Supplement: c2tc00512c.pdf [file c2tc00512c.pdf]

## Supporting Information

### **Fabrication of highly uniform three-dimensional SERS substrates by control of wettability**

*By Sung-Gyu Park<sup>†</sup>, Hyerim Hwang<sup>‡</sup>, and Seung-Man Yang<sup>‡,\*</sup>*

[<sup>†</sup>] Dr. S. -G. Park  
Advanced Functional Thin Films Department, Korea Institute of Materials Science  
(KIMS), Changwon, Gyeongnam 641-831, Korea  
Phone: +82-55-280-3632  
Fax: +82-55-280-3570

[<sup>‡</sup>] Prof. S. -M. Yang, H.R Hwang  
National Creative Research Initiative Center for Integrated Optofluidic Systems;  
Department of Chemical and Biomolecular Engineering,  
Korea Advanced Institute of Science and Technology  
335 Gwahangno, Yuseong-gu, Daejeon, 305-701 (Korea)  
Phone: +82-42-350-3962  
Fax: +82-42-350-5962  
E-mail: smyang@kaist.ac.kr

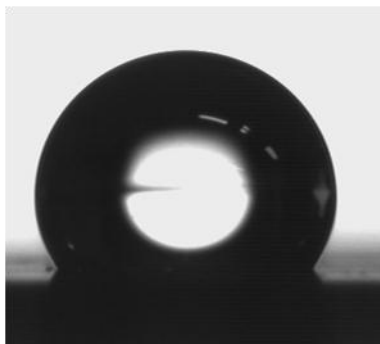

**Fig. S1.** Water profile on the as-prepared SU-8 void array. The water contact angle is  $120^\circ$ .

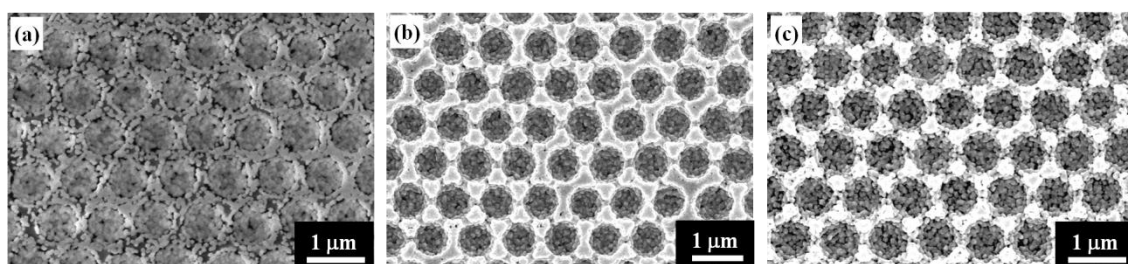

**Fig. S2.** (a) SEM image of SU-8 microvoid arrays with aggregated Ag nanoparticles. SEM images of microbowl arrays covered with aggregated Ag nanoparticles after (d) 1 min and (c) 2 min of O<sub>2</sub> RIE, and followed by 2 min of Ag electroless deposition.

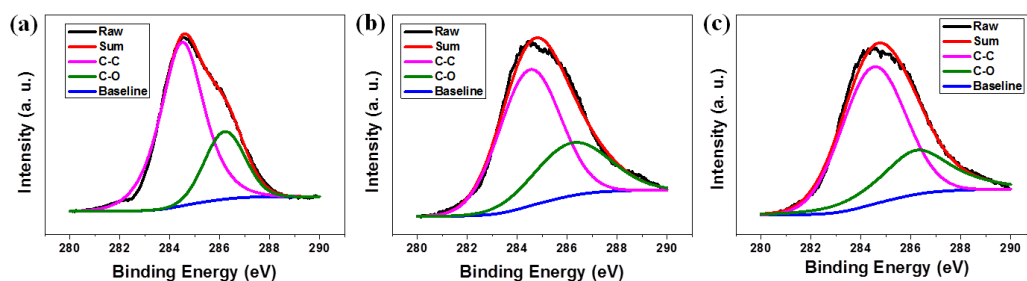

**Fig. S3.** C 1s narrow spectra of the SU-8 surfaces for (a) the as-prepared SU-8 film and the modified SU-8 film after (b) 1 min and (c) 2 min O<sub>2</sub> RIE. The pink and green lines represent C-C and C-O components, respectively. The blue line shows Shirley background.

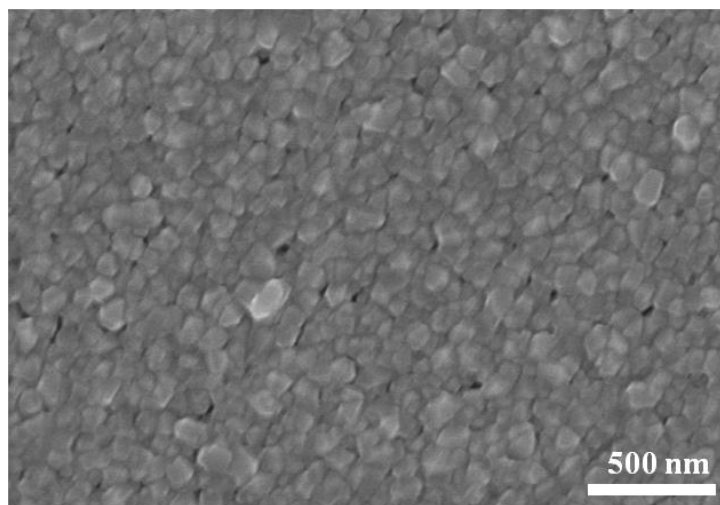

**Fig. S4.** An SEM image of Ag film deposited on the bare Si wafer.

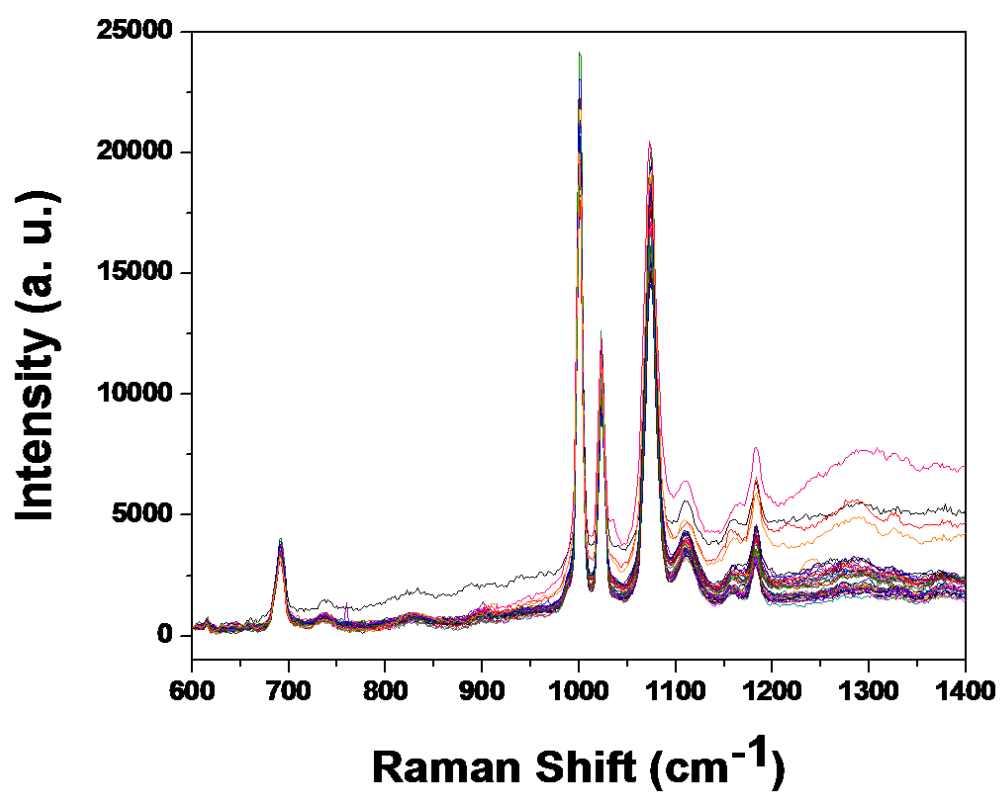

**Fig. S5.** SERS spectra of 2 μM benzenethiol. Each measurement was taken from a different point.

Video S1. Complete wetting of water on modified SU-8 microstructured thin film.  
This video shows complete wetting of a water droplet on modified SU-8 microstructured surface generated by 1 min of O<sub>2</sub> RIE.
